# Supplementary material
Source: Springer Nature journal article supplement (https://www.springermedizin.de/resource/supplementary/12987_2009_425_MOESM3_ESM.pdf/9612012)

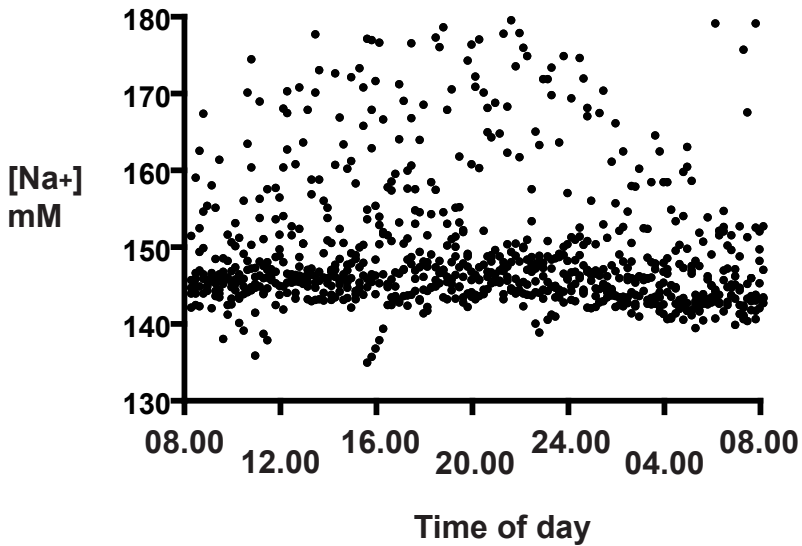

Supplement: MOESM3 [file 9612012]
